# Supplementary material
Source: PubMed Central journal article supplement (PMC2262915)
Supplement: NIHMS41119-supplement-Supp_Fig_7.pdf [file NIHMS41119-supplement-Supp_Fig_7.pdf]

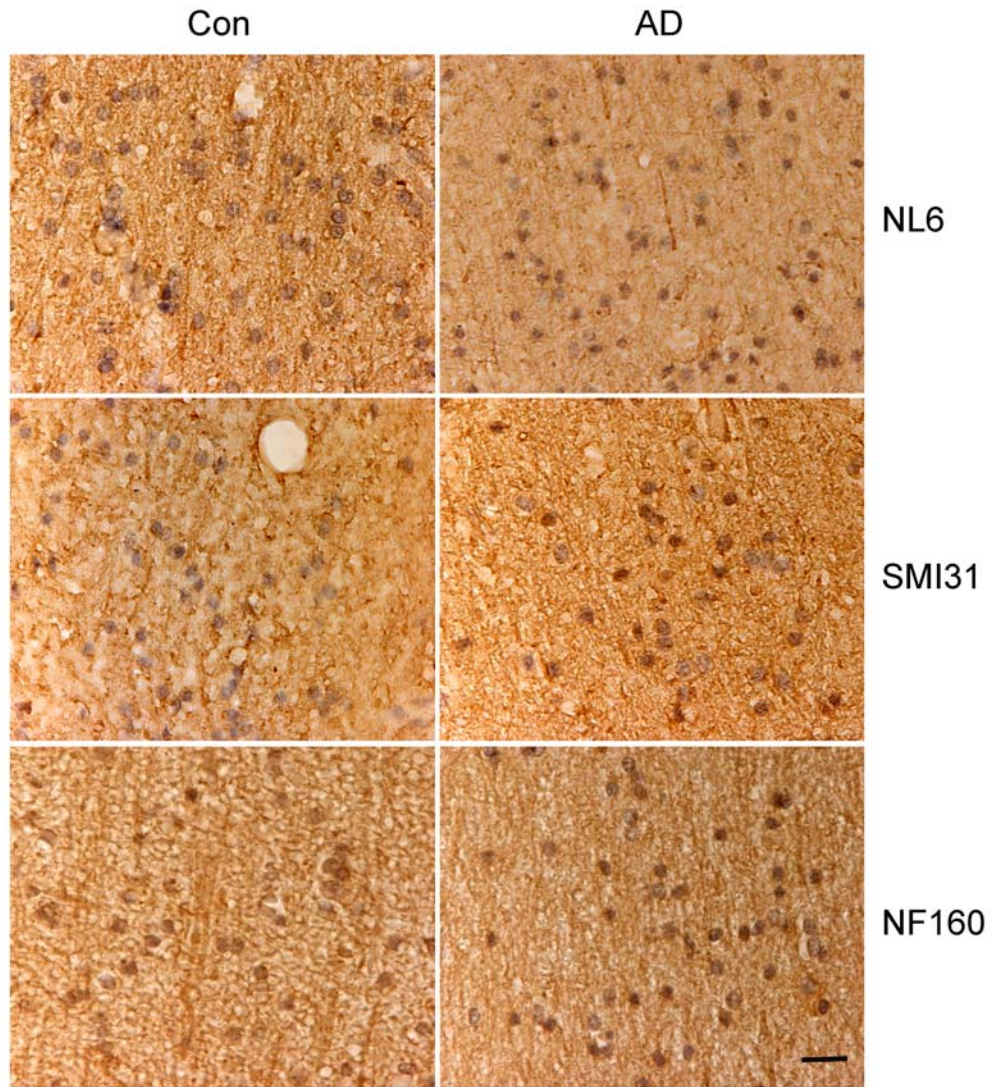

**Supplemental Figure 7.** Immunohistochemical staining of the O-GlcNAcylated NF-M (NL6), phosphorylated NF-M/H (SMI31), and total NF-M (NF160) in the cerebral white matter of AD and control brains. Scale bar, 30  $\mu$ m.
